# Supplementary material for: Phytochemical species intercalated into layered double hydroxides: structural investigation and biocompatibility assays
Source: Royal Society of Chemistry journal article supplement (doi:10.1039/d0nj00238k), 2020-01-01
Supplement: d0nj00238k1.pdf [file d0nj00238k1.pdf]

## Electronic Supplementary Information (ESI)

### **Phytochemical species intercalated into Layered Double Hydroxides: Structural Investigation and Biocompatibility Assays**

Vanessa R. R. Cunha,<sup>a#</sup> Philippe A. D. Petersen,<sup>b</sup> Rodrigo B. Souza,<sup>c</sup> Ana Maria C. R. P. F. Martins,<sup>d</sup> Fabrice Leroux,<sup>e</sup> Christine Taviot-Gueho,<sup>e</sup> Helena M. Petrilli,<sup>b</sup> Ivan H. J. Koh,<sup>f</sup> Vera R. L. Constantino<sup>\*a</sup>

<sup>a</sup> Departamento de Química Fundamental, Instituto de Química, Universidade de São Paulo, USP, Av. Prof. Lineu Prestes 748, 05508-000, São Paulo, São Paulo, Brazil.

<sup>b</sup> Departamento de Física dos Materiais e Mecânica, Instituto de Física, Universidade de São Paulo, USP, 05315-970, São Paulo, São Paulo, Brazil.

<sup>c</sup> Departamento de Morfologia e Genética, Universidade Federal de São Paulo – UNIFESP, Rua Botucatu 740, CEP 04023-900, São Paulo, SP, Brazil.

<sup>d</sup> Instituto Biológico, Secretaria da Agricultura e Abastecimento, Av. Conselheiro Rodrigues Alves 1252, CEP 04014-002, São Paulo, SP, Brazil.

<sup>e</sup> Institut de Chimie de Clermont-Ferrand ICCF, CNRS, Université Clermont Auvergne, F-63000 Clermont-Ferrand, France.

<sup>f</sup> Departamento de Cirurgia, Universidade Federal de São Paulo - UNIFESP, Rua Botucatu 740, CEP 04023-900, São Paulo, SP, Brazil.

\*Corresponding author: [vrlconst@iq.usp.br](mailto:vrlconst@iq.usp.br)

# Present address:

Instituto Federal de Educação, Ciência e Tecnologia de Mato Grosso (IFMT)

Linha J, s/nº - Zona Rural

CEP 78320-000 - Juína - MT, Brazil

## Materials

### Reagents

*p*-Coumaric acid ( $C_9H_8O_3$ , Sigma), (i) main vibrational modes:<sup>1</sup> 1680  $cm^{-1}$  (carbonyl stretching mode of the carboxyl group), 1447 and 1171  $cm^{-1}$  (bending of the aromatic ring) and 930  $cm^{-1}$  (OH bending, of the carboxyl group) and (ii) main chemical shifts: 172 ppm (C1a, carboxylic group), 157 ppm (C3a, styrene group) and 136 ppm (2b,6b, carbon from the aromatic ring). Magnesium chloride hexahydrate ( $MgCl_2 \cdot 6H_2O$ , Synth), aluminum chloride hexahydrate ( $AlCl_3 \cdot 6H_2O$ , Aldrich), zinc chloride ( $ZnCl_2$ , Aldrich), sodium hydroxide (NaOH, Merck), paraformaldehyde solution 4 % (Synth), historesin (Technovitz®7100, Kulzer), hematoxylin ( $C_{16}H_{14}O_6$ , Vetec), eosin ( $C_{20}H_6Br_4Na_2O_5$ , Vetec), Picrosirius red ( $C_{45}H_{26}N_{10}Na_6O_{21}S_6$ , Alfa Aesar), and polypropylene mesh (Prolenet<sup>TM</sup>, Ethicon) were used without further purification.

### Physicochemical characterization of LDH-Cou

The *p*-coumaric acid salt exhibits its typical X-ray diffraction patterns, as shown in Fig. S1.<sup>2,3</sup>

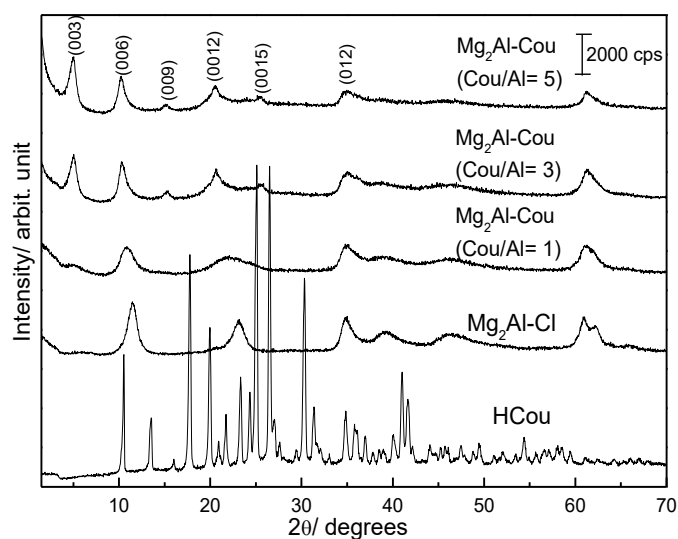

**Fig. S1.** PXRD patterns of HCOu,  $Mg_2Al-Cl$ , and  $Mg_2Al-Cou$  with Cou/Al molar ratio equal to 1, 3 and 5.

**Table S1:** Interplanar distance ( $d_{hkl}$ ) and  $2\theta$  ( $\lambda=1.54 \text{ \AA}$ ) of  $\text{Mg}_2\text{Al-Cou}$  and  $\text{Zn}_2\text{Al-Cou}$  samples obtained from XRD data.

| <b>Mg<sub>2</sub>Al-Cou<br/>(Cou/Al=1)</b> |                                   | <b>Mg<sub>2</sub>Al-Cou<br/>(Cou/Al=3)</b> |                                   | <b>Mg<sub>2</sub>Al-Cou<br/>(Cou/Al=5)</b> |                                   | <b>Zn<sub>2</sub>Al-Cou<br/>(Cou/Al=3)</b> |                                   | <b>hkl</b>  |
|--------------------------------------------|-----------------------------------|--------------------------------------------|-----------------------------------|--------------------------------------------|-----------------------------------|--------------------------------------------|-----------------------------------|-------------|
| <b>2<math>\theta</math></b>                | <b>d(<math>\text{\AA}</math>)</b> | <b>2<math>\theta</math></b>                | <b>d(<math>\text{\AA}</math>)</b> | <b>2<math>\theta</math></b>                | <b>d(<math>\text{\AA}</math>)</b> | <b>2<math>\theta</math></b>                | <b>d(<math>\text{\AA}</math>)</b> |             |
| 5.13                                       | 17.21                             | 5.04                                       | 17.51                             | 5.04                                       | 17.51                             | 5.13                                       | 17.20                             | (003)       |
| 10.86                                      | 8.14                              | 10.26                                      | 8.61                              | 10.26                                      | 8.61                              | 10.20                                      | 8.66                              | (006)       |
| -                                          | -                                 | 15.36                                      | 5.76                              | 15.06                                      | 5.88                              | 15.33                                      | 5.77                              | (009)       |
| -                                          | -                                 | 20.61                                      | 4.30                              | 20.52                                      | 4.32                              | 20.55                                      | 4.32                              | (0012)      |
|                                            |                                   | 25.83                                      | 3.45                              | 25.14                                      | 3.54                              | 25.77                                      | 3.45                              | (0015)      |
| 61.23                                      | 1.51                              | 61.26                                      | 1.51                              | 61.23                                      | 1.51                              | 60.60                                      | 1.53                              | (110)/(113) |

**Table S2:** Elemental analysis (CHN) data, metal contents and the percentage of  $\text{H}_2\text{O}$  (obtained from TGA curve) of LDH-Cou materials.

| <b>Sample</b>                        | <b>M<sup>II</sup>/Al<sup>a</sup></b> | <b>%C</b> | <b><u>%H<sub>2</sub>O</u></b> | <b>%/<br/>w/w</b> |
|--------------------------------------|--------------------------------------|-----------|-------------------------------|-------------------|
| Mg <sub>2</sub> Al-Cou<br>(Cou/Al=1) | 2.39                                 | 13.4      | 16.2                          | 19.9              |
| Mg <sub>2</sub> Al-Cou<br>(Cou/Al=3) | 2.18                                 | 20.9      | 16                            | 31.3              |
| Mg <sub>2</sub> Al-Cou<br>(Cou/Al=5) | 1.93                                 | 21.5      | 18.2                          | 32.4              |
| Zn <sub>2</sub> Al-Cou<br>(Cou/Al=3) | 2.15                                 | 23.6      | 7.0                           | 34.8              |

a) molar ratio where M<sup>II</sup> = Mg or Zn;

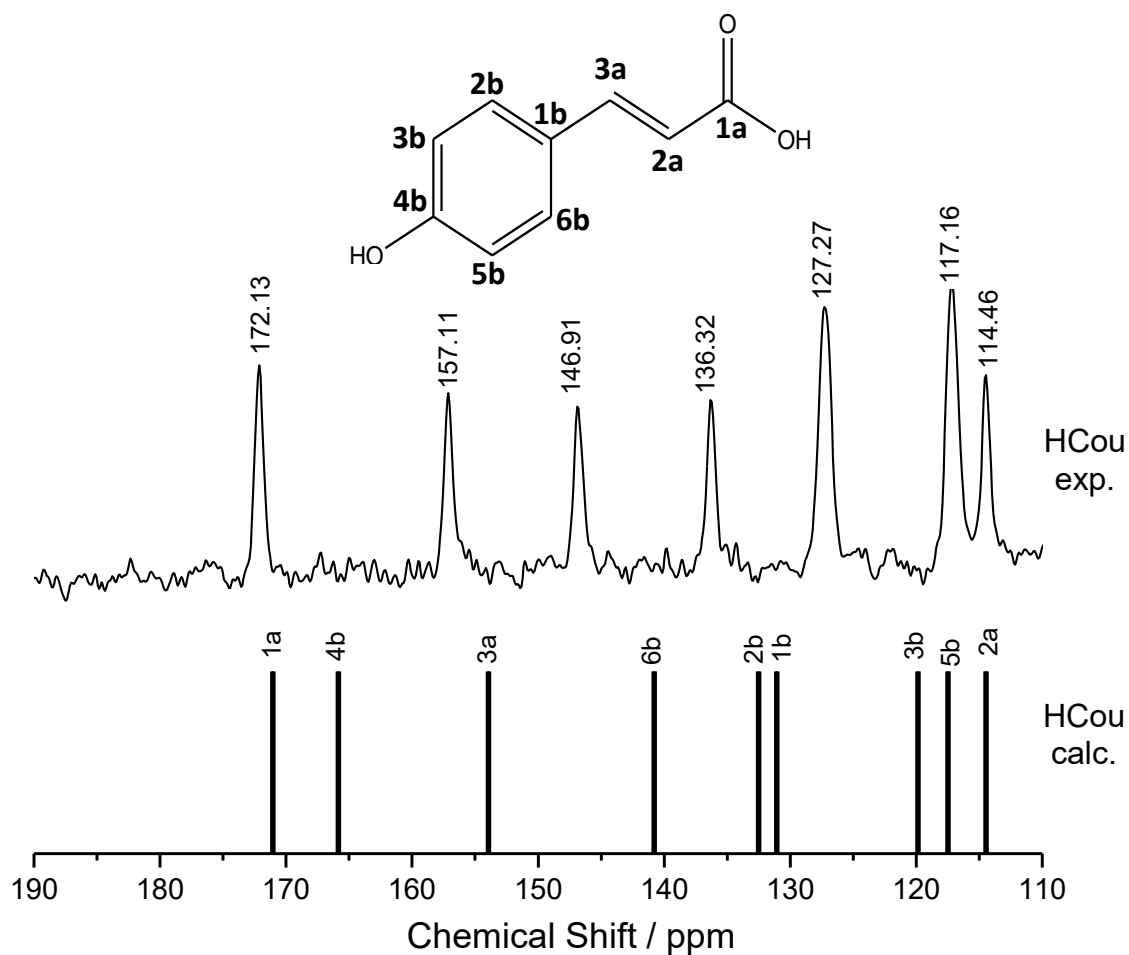

**Fig. S2.**  $^{13}\text{C}$  NMR spectra of experimental and calculated HCoU.

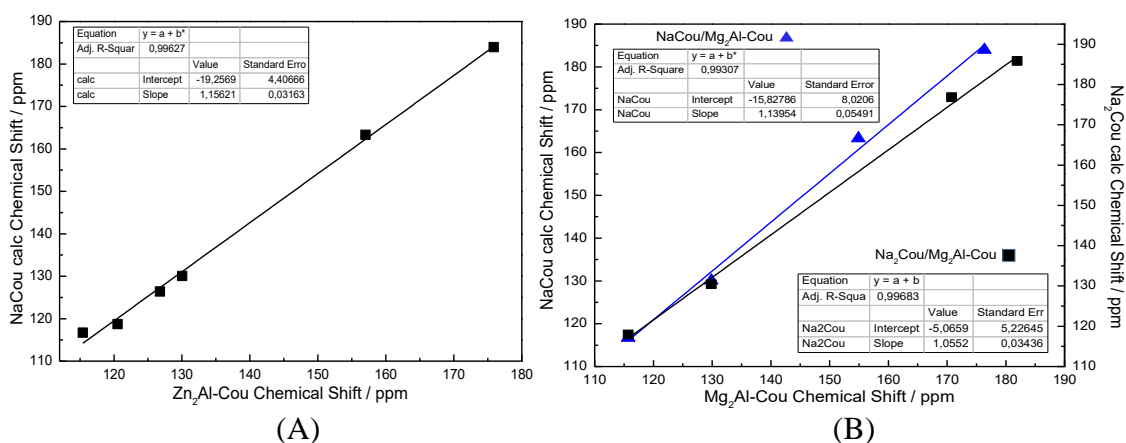

**Fig. S3.** Linear correlation of the  $^{13}\text{C}$  NMR spectra chemical shifts: (A) Zn<sub>2</sub>Al-Cou and calculated Na<sub>2</sub>O and (B) Mg<sub>2</sub>Al-Cou with calculated Na<sub>2</sub>O and Na<sub>2</sub>O.

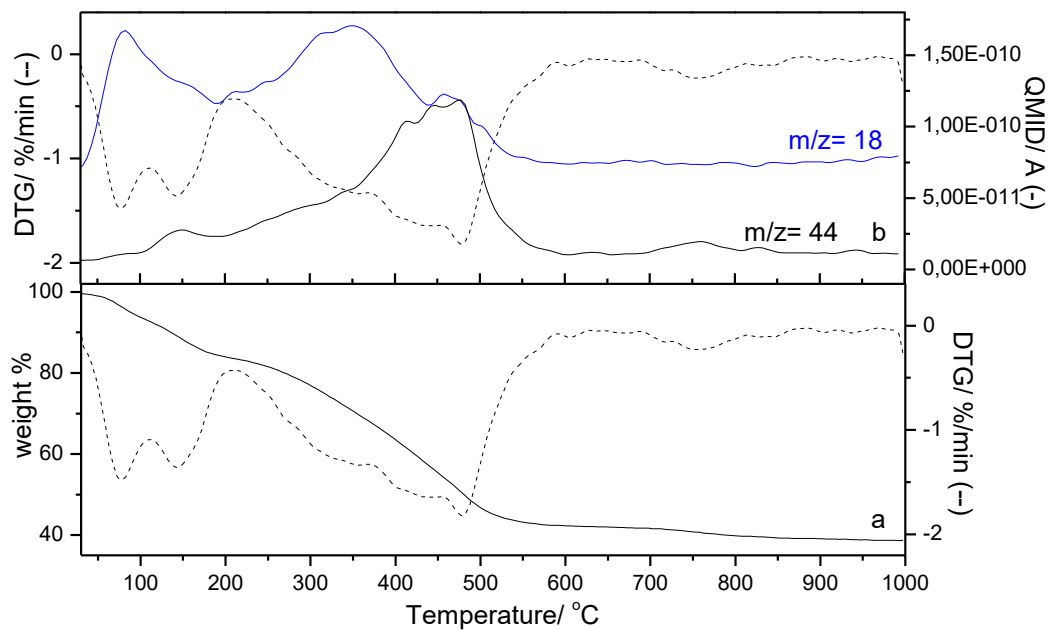

**Fig. S4.** (a) TGA (-) and DTG (--) and (b) DTG (--) and MS (-) curves of  $Mg_2Al$ -Cou (Cou/Al=3) sample.

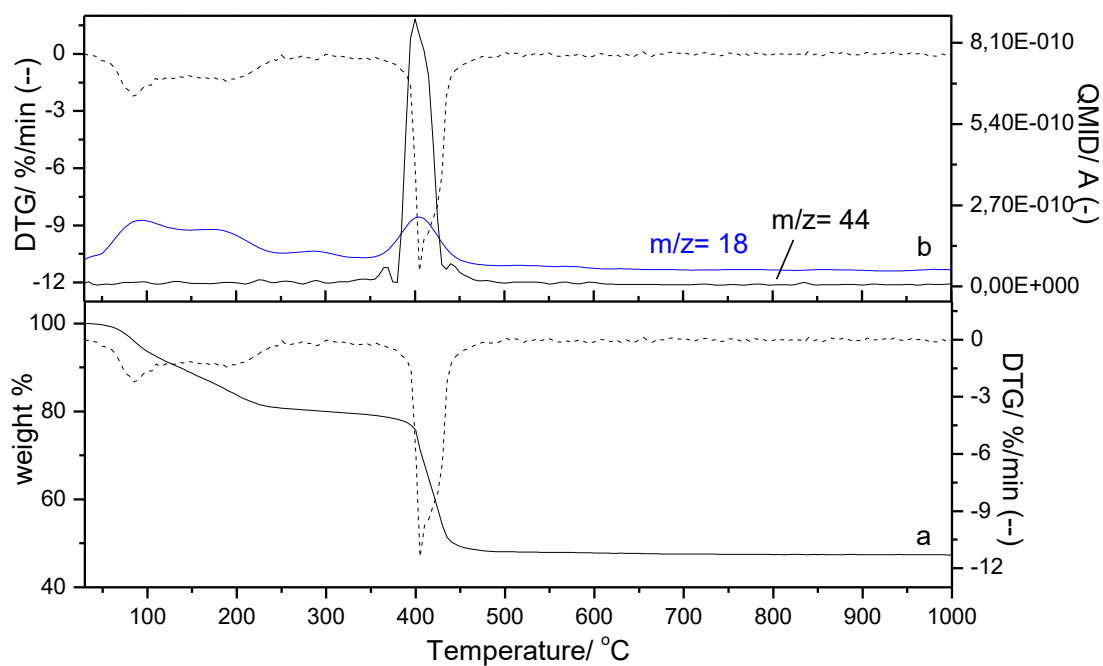

**Fig. S5.** (a) TGA (-) and DTG (--) and (b) DTG (--) and MS (-) curves of  $Zn_2Al$ -Cou (Cou/Al=3) sample.

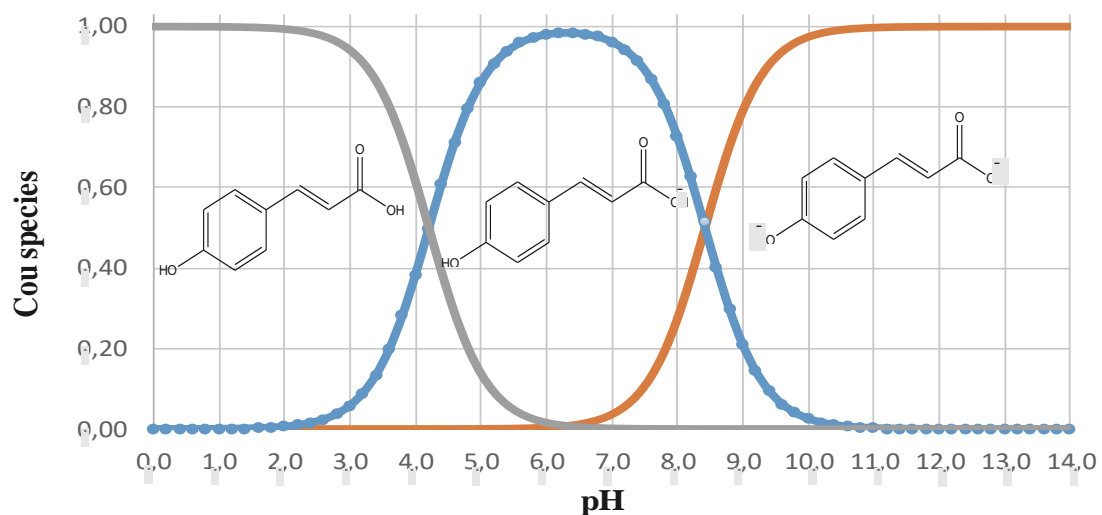

(a)

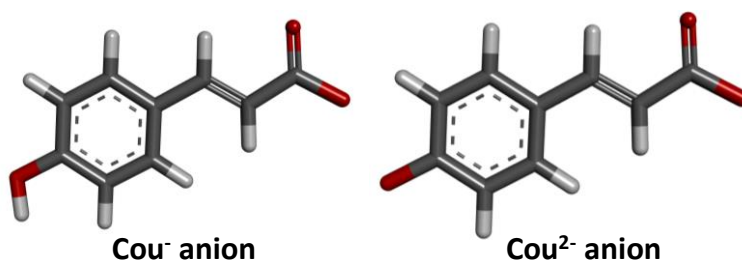Cou<sup>-</sup> anionCou<sup>2-</sup> anion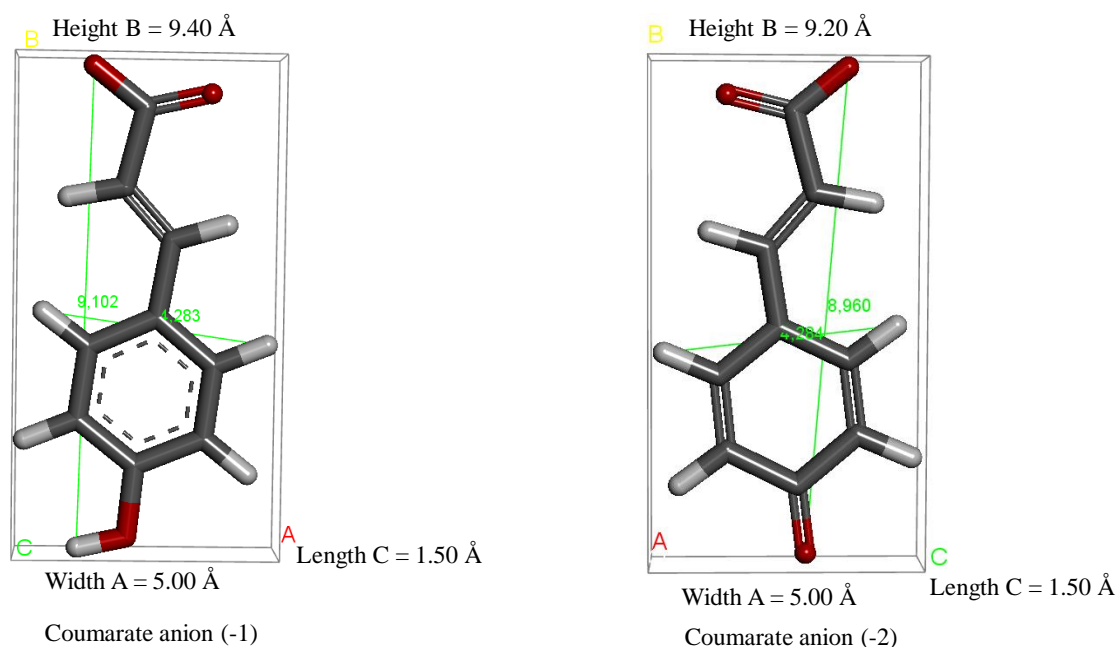

(b)

**Fig. S6.** (a) Distribution of Coumaric acid and coumarate anions species as a function of pH value; (b) Schematic representation of Coumarate ions structure and dimensions achieved by DFT calculations.

**REFERENCES**

---

- 1 V.R.R. Cunha, V.R.L. Constantino and R.A. Ando, Raman spectroscopy and DFT calculations of para-coumaric acid and its deprotonated species, *Vibrat. Spect.* 2012, **58**, 139-145.
- 2 M.J. Bevill, P.I. Vlahova and J.P. Smit, Polymorphic cocrystals of nutraceutical compound p-coumaric acid with nicotinamide: Characterization, relative solid-state stability, and conversion to alternate stoichiometries, *Cryst. Growth Des.*, 2014, **14**, 1438-1448.
- 3 A. Jacobs and F.M.A. Noa, Hybrid salt-cocrystal solvate: p-coumaric acid and quinine system, *J. Chem. Crystallogr.*, 2014, **44**, 57-62.
